# Supplementary material
Source: PubMed Central journal article supplement (PMC3547098)
Supplement: supp_47.6.843_Xiao_ODS.pdf [file supp_47.6.843_Xiao_ODS.pdf]

*In utero* exposure to second-hand smoke (SHS) aggravates adult responses to irritants: I. Adult SHS

Rui Xiao, Zakia Perveen, Daniel Paulsen, Rodney Rouse, Namasivayam Ambalavanan, Michael Kearney, Arthur Penn

ONLINE DATA SUPPLEMENT
